# Supplementary material
Source: HighWire-hosted journal article supplement (https://www.life-science-alliance.org/content/6/7/e202201639/F15)
Supplement: inline-supplementary-material-18 [file inline-supplementary-material-18.pdf]

Well Number: A09

Sample ID: A09

File Name: C:/Users/keygg/Desktop/ssx/20210108 RKO DW/2021-01-08\_at\_06-10-36pm.fcs

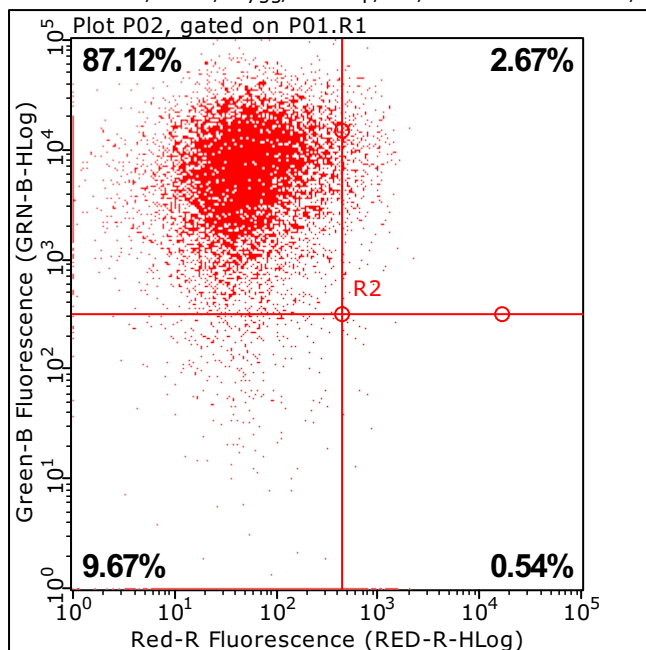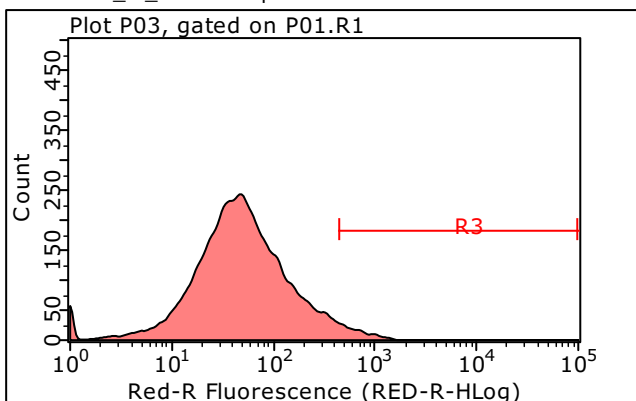

| Well | Sample ID | Date       | R2.Percent.UL<br>Percent<br>for R2<br>gated by P01.R1<br>(%) | R2.Percent.UR<br>Percent<br>for R2<br>gated by P01.R1<br>(%) | R2.Percent.LL<br>Percent<br>for R2<br>gated by P01.R1<br>(%) |
|------|-----------|------------|--------------------------------------------------------------|--------------------------------------------------------------|--------------------------------------------------------------|
| A09  | A09       | 01.15.2021 | 87.12                                                        | 2.67                                                         | 9.67                                                         |

| Well | R2.Percent.LR<br>Percent<br>for R2<br>gated by P01.R1<br>(%) | R3.Percent<br>Percent<br>for R3<br>gated by P01.R1<br>(%) |
|------|--------------------------------------------------------------|-----------------------------------------------------------|
| A09  | 0.54                                                         | 3.21                                                      |
