# Supplementary material
Source: HighWire-hosted journal article supplement (https://www.life-science-alliance.org/content/6/7/e202201639/F15)
Supplement: inline-supplementary-material-19 [file inline-supplementary-material-19.pdf]

Well Number: A11

Sample ID: A11

File Name: C:/Users/keygg/Desktop/ssx/20210108 RKO DW/2021-01-08\_at\_06-10-36pm.fcs

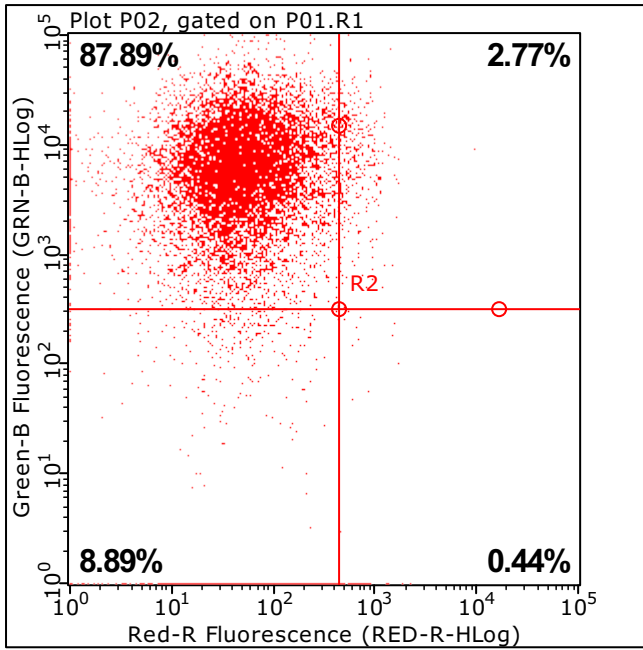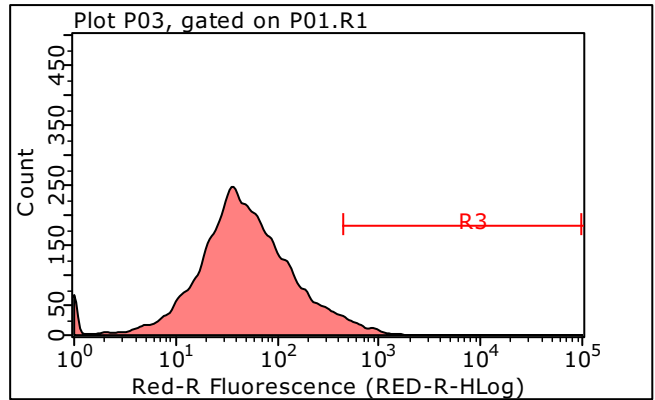

| Well | Sample ID | Date       | R2.Percent.UL<br>Percent<br>for R2<br>gated by P01.R1<br>(%) | R2.Percent.UR<br>Percent<br>for R2<br>gated by P01.R1<br>(%) | R2.Percent.LL<br>Percent<br>for R2<br>gated by P01.R1<br>(%) |
|------|-----------|------------|--------------------------------------------------------------|--------------------------------------------------------------|--------------------------------------------------------------|
| A11  | A11       | 01.15.2021 | 87.89                                                        | 2.77                                                         | 8.89                                                         |

| Well | R2.Percent.LR<br>Percent<br>for R2<br>gated by P01.R1<br>(%) | R3.Percent<br>Percent<br>for R3<br>gated by P01.R1<br>(%) |
|------|--------------------------------------------------------------|-----------------------------------------------------------|
| A11  | 0.44                                                         | 3.22                                                      |
